# Supplementary material for: Effect of processing additive on morphology and charge extraction in bulk-heterojunction solar cells
Source: Royal Society of Chemistry journal article supplement (doi:10.1039/c4ta03091e), 2014-01-01
Supplement: c4ta03091e1.pdf [file c4ta03091e1.pdf]

## Supplementary Information

### **Effect of Processing Additive on Morphology and Charge Extraction in Bulk-Heterojunction Solar Cells**

**Dong Hwan Wang,<sup>\*,a</sup> Pierre-Olivier Morin,<sup>b</sup> Chang-Lyoul Lee,<sup>c</sup> Aung Ko Ko Kyaw,<sup>d,e</sup> Mario Leclerc<sup>b</sup> and Alan J. Heeger<sup>\*,e</sup>**

**Characterization:** <sup>1</sup>H and <sup>13</sup>C NMR spectra were recorded using a Varian AS400 in deuterated chloroform or acetone solution at 298 K. Chemicals shifts were reported as  $\delta$  values (ppm) relative to chloroform value of 7.26 ppm. For our size-exclusion chromatography (SEC) measurements, we used a Varian Polymer Laboratories GPC220 equipped with a RI detector, a PL BV400 HT Bridge Viscometer, 2 PLgel Mixed C (300 x 7.5 mm) columns and a PLgel Mixec C Guard column. The temperature of the system was set to 110°C and the 1,2,4-trichlorobenzene (TCB) (with 0.0125% BHT w/v) flow was set to 1mL/min. The samples (2 mg) were dissolved in 2 mL of TCB in a 5 mL chromatography vial then stirred and heated to 110°C for 1 hour to let aggregates completely dissolve. Then, a filtration through a .45  $\mu$ m cellulose fiber film in a 5 mL chromatography vial lead to a homogenous polymeric solution. The sample was injected though a loop of 200  $\mu$ L with a Varian Polymer Laboratories PL-SP 260VC sample preparation system. Calibration was set with narrow polystyrene standards. UV-vis-NIR absorption spectra were recorded using a Varian Cary 500 UV-vis-NIR spectrophotometer using 1 cm path length quartz cells. A polymeric solution was spin-coated on untreated glass substrate in order to perform the solid-state measurement. The optical bandgap was calculated from the onset of the absorption band. Cyclic

voltamograms were recorded from a Solartron 1287 Potentiostat using a three-electrode set-up; a working and counter electrodes in platinum and an Ag/Ag<sup>+</sup> (0.1 M of AgNO<sub>3</sub> in anhydrous acetonitrile) reference electrode. The scan rate was 50 mVs<sup>-1</sup> and the electrolyte was an anhydrous argon saturated solution of 0.1 M of tetrabutylammonium tetrafluoroborate (Bu<sub>4</sub>NBF<sub>4</sub>). Thin films were made by casting a diluted solution of a copolymer on the working electrode, dried under ambient conditions. For each measurement, a new film was cast. The HOMO and LUMO energy levels were determined from the oxidation and reduction onsets, assuming an SCE electrode to be at -4.7 eV from vacuum.

Table S1. Information of synthesized polymer of PBnDT-FTAZ.

| Polymer    | Mn<br>(kDa) | Mw<br>(kDa) | PDI | Yield<br>(%) | HOMO<br>(eV) | LUMO<br>(eV) | E <sub>g</sub> <sup>CV</sup> | E <sub>g</sub> <sup>Opt</sup> |
|------------|-------------|-------------|-----|--------------|--------------|--------------|------------------------------|-------------------------------|
| PBnDt-FTAZ | 73          | 146         | 2.0 | 91           | -5.32        | -3.38        | 1.94                         | 1.91                          |

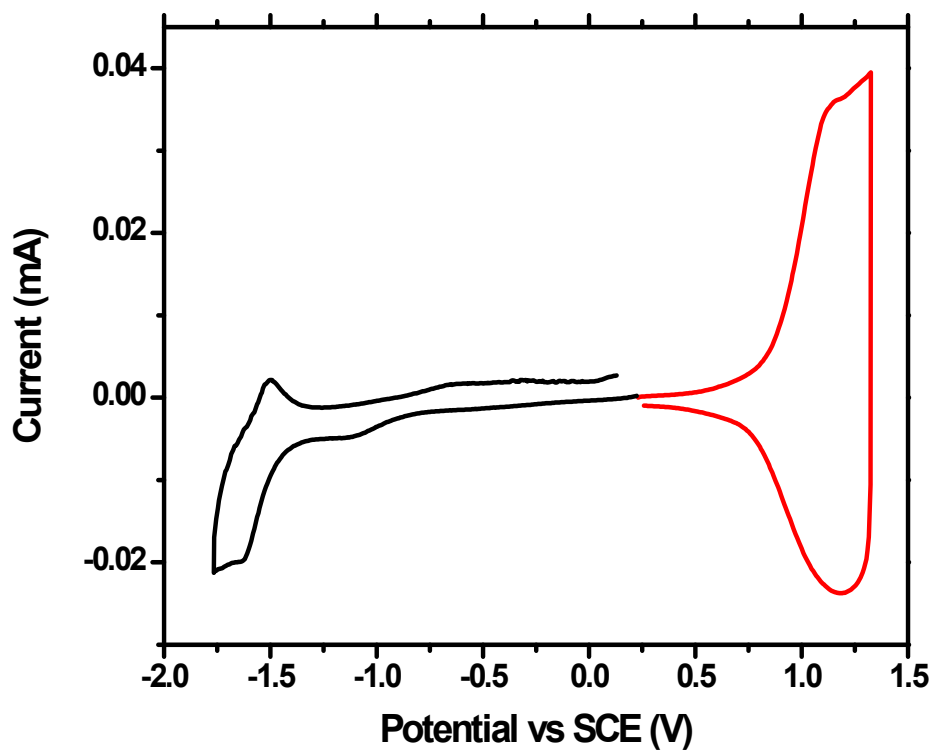

Figure S1. Cyclic voltammetry (black line: reduction and red line: oxidation) of PBNdT-FTAZ. The HOMO and LUMO level of PBNdT-FTAZ shows -5.32 eV and -3.38 eV, respectively.

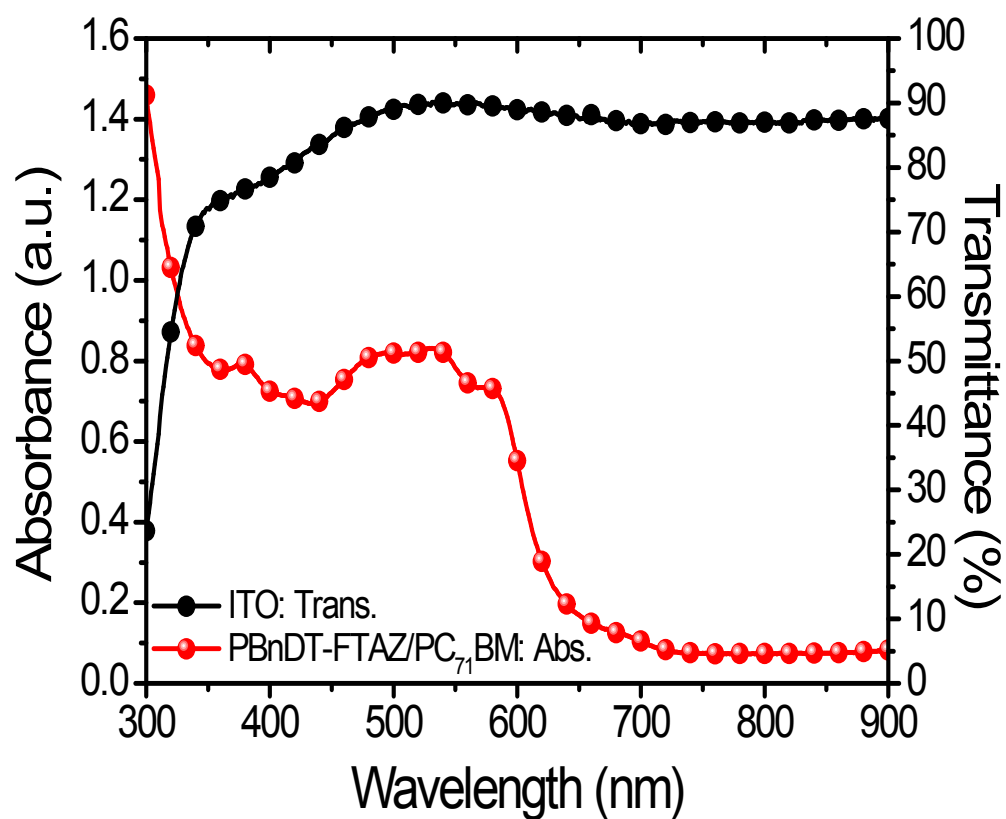

Figure S2. Normalized UV-vis absorption spectra of PBnDT-FTAZ:PC<sub>70</sub>BM BHJ film (red curve) and transmittance of the ITO substrate (black curve).

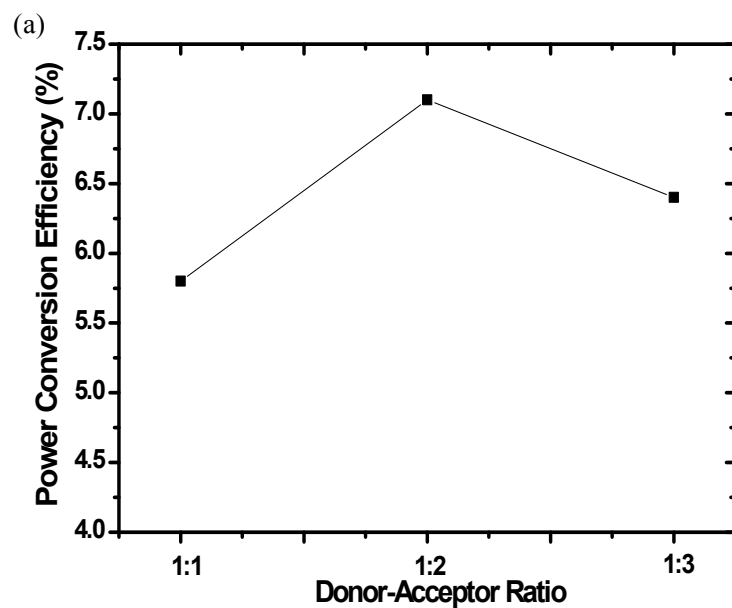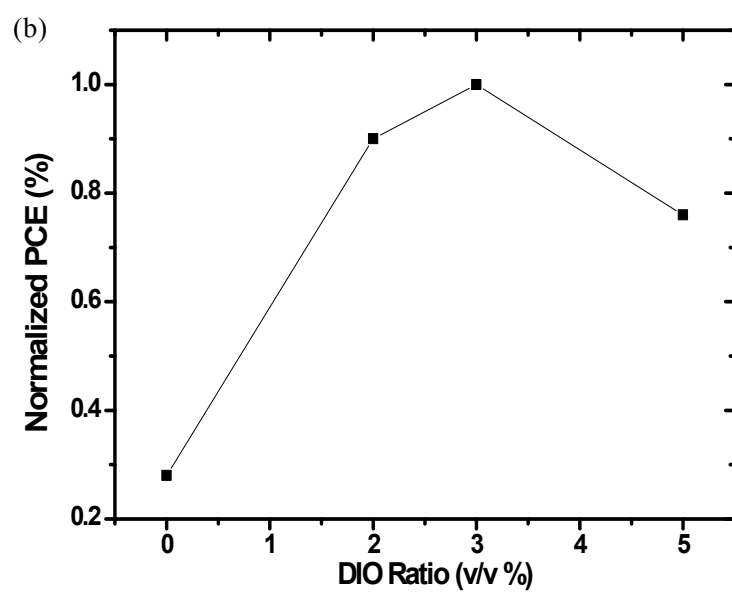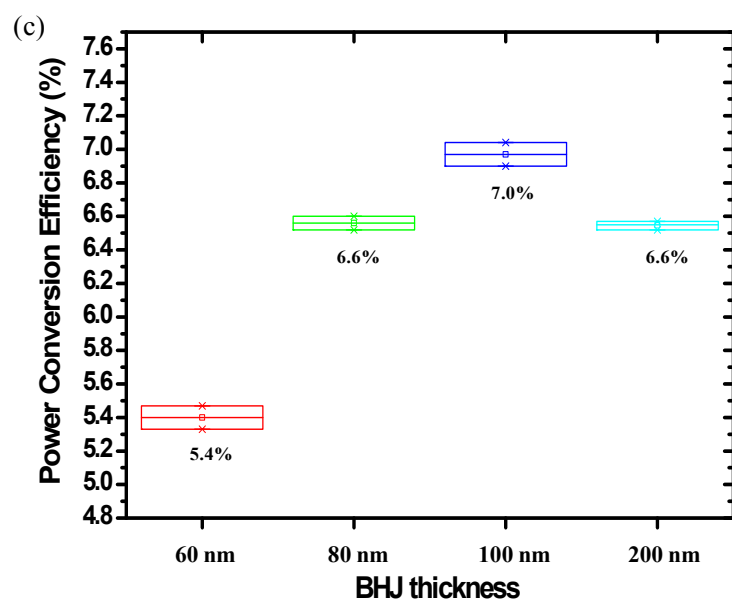

Figure S3. PCE ranges of the PBnDT-FTAZ:PC<sub>70</sub>BM BHJ device fabricated with (a) donor:acceptor ratio from 1:1 to 1:3, (b) Normalized PCE of DIO ratio from 0% to 5%, and (c) Average PCE depending on BHJ thicknesses from 60 nm to 200 nm (DIO 3%).

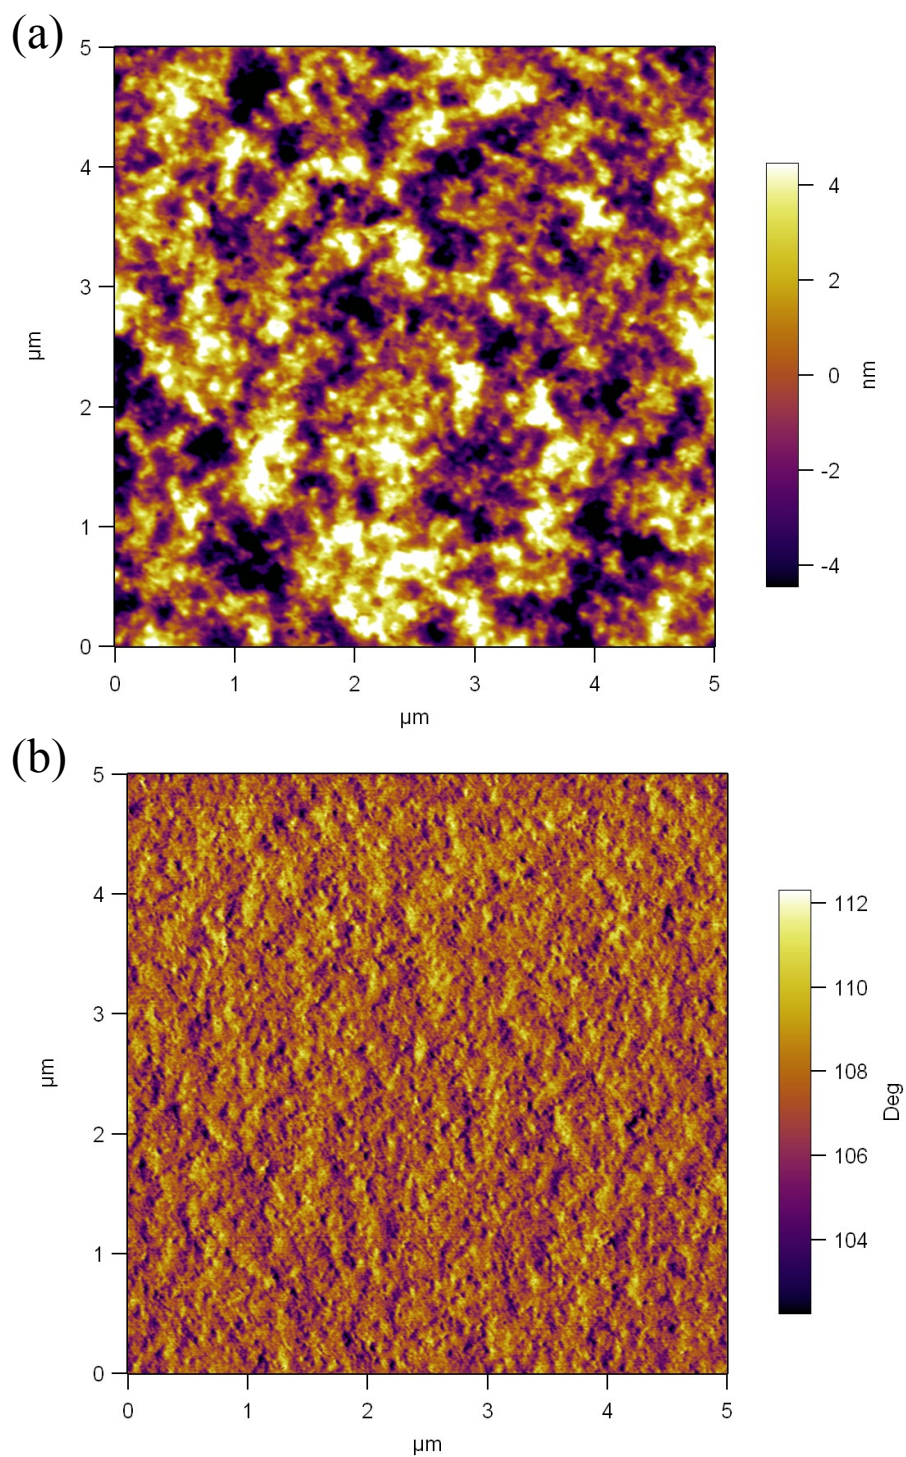

Figure S4. AFM two dimensional images of PBnDT-FTAZ:PC<sub>70</sub>BM BHJ fabricated with DIO (3%); height images (a) and phase images (b). The D-A ratio of BHJ is 1:2.
